# Supplementary material
Source: PubMed Central journal article supplement (PMC2265327)
Supplement: bmj_39471.430451.BE_1.pdf [file bmj_39471.430451.BE_1.pdf]

## **Studies systematically reviewed [posted as supplied by author]**

### *References of studies included in systematic review:*

- w1. Benson MR, Elkind-Hirsch KE, Theall A, Fong K, Hogan RB, Scott RT. Impact of acupuncture before and after embryo transfer on the outcome of in vitro fertilization cycles: a prospective single-blind randomized study. *Fertil Steril* 2006;86:S135 (Abstract P-18).
- w2. Dieterle S, Ying G, Hatzmann W, Neuer A. Effect of acupuncture on the outcome of in vitro fertilization and intracytoplasmic sperm injection: a randomized, prospective, controlled clinical study. *Fertil Steril* 2006;85:1347-51.
- w3. Domar AD, Meshay I, Kelliher J, Wang S, Alper M. The impact of acupuncture on IVF outcome. *Fertil Steril* 2006;86:S378-9 (Abstract P-663).
- w4. Paulus WE, Zhang M, Strehler E, El-Danasouri I, Sterzik K. Influence of acupuncture on the pregnancy rate in patients who undergo assisted reproduction therapy. *Fertil Steril* 2002;77:721-4.
- w5. Paulus WE, Zhang M, Strehler E, Seybold B, Sterzik K. Placebo-controlled trial of acupuncture effects in assisted reproduction therapy. *Hum Reprod* 2003;18:xviii18-9.
- w6. Smith C, Coyle M, Norman RJ. Influence of acupuncture stimulation on pregnancy rates for women undergoing embryo transfer. *Fertil Steril* 2006;85:1352-8.
- w7. Westergaard LG, Mao Q, Kroglund M, Sandrini S, Lenz S, Grinsted J. Acupuncture on the day of embryo transfer significantly improves the reproductive outcome in infertile women: a prospective, randomized trial. *Fertil Steril* 2006;85:1341-6.

### *References of studies excluded from systematic review:*

- w8. Gejervall AL, Stener-Victorin E, Moller A, Janson PO, Werner C, Bergh C. Electro-acupuncture versus conventional analgesia: a comparison of pain levels during oocyte aspiration and patients' experiences of well-being after surgery. *Hum Reprod* 2005;20:728-35.
- w9. Humaidan P, Stener-Victorin E. Pain relief during oocyte retrieval with a new short duration electro-acupuncture technique--an alternative to conventional analgesic methods. *Hum Reprod* 2004;19:1367-72.
- w10. Quintero R. A randomized, controlled, double blind, cross-over study evaluating acupuncture as an adjunct to IVF. *Fertil Steril* 2004;81 Suppl 3:11-2.
- w11. Sator-Katzenschlager SM, Wolfler MM, Kozek-Langenecker SA, Sator K, Sator PG, Li B, et al. Auricular electro-acupuncture as an additional perioperative analgesic method during oocyte aspiration in IVF treatment. *Hum Reprod* 2006;21:2114-20.
- w12. Stener-Victorin E, Waldenstrom U, Nilsson L, Wikland M, Janson PO. A prospective randomized study of electro-acupuncture versus alfentanil as anaesthesia during oocyte aspiration in in-vitro fertilization. *Hum Reprod* 1999;14:2480-4.
- w13. Stener-Victorin E, Waldenstrom U, Wikland M, Nilsson L, Hagglund L, Lundeborg T. Electro-acupuncture as a peroperative analgesic method and its effects on implantation rate and

neuropeptide Y concentrations in follicular fluid. *Hum Reprod* 2003;18:1454-60.

w14. Udoff LC, Zhang G, Patwardhan S, Wei Z, McClamrock HD. The effect of acupuncture on outcomes in in-vitro fertilization (IVF). *Fertil Steril* 2006;86:S145 (Abstract P-45).

w15. Zhang M, Guangying H, Lu F, Paulus WE, Sterzik K. Effect of acupuncture on pregnancy rate in embryo transfer [Chinese]. *Chinese Acupuncture and Moxibustion* 2002;8:507-9.

w16. Zhang M, Guangying H, Lu F, Paulus WE, Sterzik K. Effect of acupuncture on the pregnancy rate in embryo transfer and mechanisms: a randomized and control study [Chinese]. *Chinese Acupuncture and Moxibustion* 2003;23:3-5.

w17. Zhang M, Paulus WE, Strehler E, Jelinkova L, Sterzik K. Increase of pregnancy rate in assisted reproduction therapy by acupuncture. *Fertil Steril* 2001;76(3 Suppl 1):S75 (Abstract O-199). [This abstract is a brief report of the Paulus et al 2002 trial.<sup>w4</sup> The funding source for this study was extracted from this abstract because it was not reported in the 2002 full publication.<sup>w4</sup>]

---
